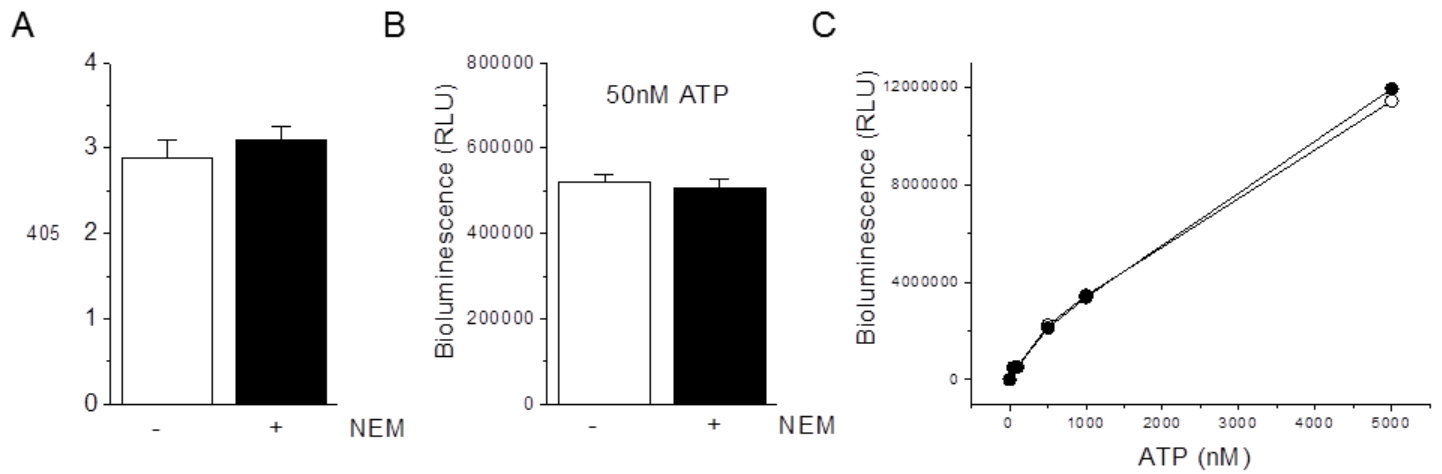

**Fig. S1. No direct effect of *N*-ethylmaleimide (NEM) on  $\beta$ -hexosaminidase or ATP secretion assays.** (A)  $\beta$ -hexosaminidase assayed following 1% (v/v) Triton X-100-induced release in the presence and absence of 1 mM NEM ( $n=3$ ;  $P>0.05$ ). Bioluminescence values for 50 nM ATP (B) and ATP standard curve (C) in the presence (open circles) or absence (closed circles) of 1 mM NEM ( $n=3$ ;  $P>0.05$ ).
